# Supplementary material for: High-Density “Windowpane” Coordination Patterns of Water Clusters and Their NBO/NRT Characterization
Source: MDPI journal article supplement (doi:10.3390/molecules27134218), 2022-06-30
Supplement: s1 [file s1]

**SUPPLEMENTARY INFORMATION for “High-Density ‘Windowpane’  
Coordination Patterns of Water Clusters and their NBO/NRT Characterization”**

F. Weinhold\*

*Theoretical Chemistry Institute and Department of Chemistry, University of  
Wisconsin-Madison, Madison, Wisconsin 53706 (weinhold@chem.wisc.edu)*

This Supplementary Information (SI) consists of three sections:

- (i) **NPA Charge Distributions** (pp. 2-7), displaying the natural atomic charge ( $Q_A$ ) values for all monomer units of all windowpane clusters  ${}^{q,t,d}W_n$ , in tables similar to Table 1 of the main text;
- (ii) **NRT Bond Order Distributions** (pp. 8-15), displaying the NRT bond orders  $\{b_{O\cdots O}\}$  and associated  $R_{O\cdots O}$  distances (Å) for all O–H $\cdots$ O hydrogen bonds of all windowpane clusters  ${}^{q,t,d}W_n$ , in tables similar to Table 2 of the main text;
- (iii) **Optimized Cluster Geometries** (pp. 16-33), displaying ready-to-run *Gaussian-16* input files containing the optimized geometry, vibrational frequencies, and other thermochemical data for all windowpane clusters  ${}^{q,t,d}W_n$ , together with NBO keyword input to obtain the NRT bond orders and other NBO-based descriptors.

### NPA Charge Distributions

| cluster       | $O_i$ | $Q_i$    | $q/t/d$ |
|---------------|-------|----------|---------|
| $^{0,2,4}W_6$ | 1     | -0.00815 | $t_d$   |
|               | 4     | +0.00247 | $d$     |
|               | 7     | -0.00212 | $d$     |
|               | 10    | +0.00797 | $t_a$   |
|               | 13    | -0.00238 | $d$     |
|               | 16    | +0.00222 | $d$     |

| cluster       | $O_i$ | $Q_i$    | $q/t/d$ |
|---------------|-------|----------|---------|
| $^{1,0,6}W_7$ | 1     | -0.00095 | $d$     |
|               | 4     | +0.00108 | $d$     |
|               | 7     | -0.00047 | $d$     |
|               | 10    | +0.00396 | $q$     |
|               | 13    | -0.00206 | $d$     |
|               | 16    | -0.00262 | $d$     |
|               | 19    | +0.00106 | $d$     |

| cluster       | $O_i$ | $Q_i$    | $q/t/d$ |
|---------------|-------|----------|---------|
| $^{0,4,4}W_8$ | 1     | -0.00710 | $t_d$   |
|               | 4     | +0.00285 | $d$     |
|               | 7     | -0.00240 | $d$     |
|               | 10    | +0.00619 | $t_a$   |
|               | 13    | +0.00247 | $t_a$   |
|               | 16    | -0.00119 | $t_d$   |
|               | 19    | -0.00347 | $d$     |
|               | 22    | +0.00262 | $d$     |

| cluster       | $O_i$ | $Q_i$    | $q/t/d$ |
|---------------|-------|----------|---------|
| $^{0,8,0}W_8$ | 1     | -0.01797 | $t_d$   |
|               | 4     | +0.01787 | $t_a$   |
|               | 7     | -0.01799 | $t_d$   |
|               | 10    | +0.01801 | $t_a$   |
|               | 13    | -0.01796 | $t_d$   |
|               | 16    | +0.01799 | $t_a$   |
|               | 19    | -0.01806 | $t_d$   |
|               | 22    | +0.01811 | $t_a$   |

| cluster       | $O_i$ | $Q_i$    | $q/t/d$ |
|---------------|-------|----------|---------|
| $^{1,2,5}W_8$ | 1     | -0.00580 | $t_d$   |
|               | 4     | +0.00147 | $d$     |
|               | 7     | +0.00276 | $d$     |
|               | 10    | -0.00963 | $q$     |
|               | 13    | +0.01800 | $t_a$   |
|               | 16    | -0.00314 | $d$     |
|               | 19    | -0.00293 | $d$     |
|               | 22    | -0.00073 | $d$     |

| cluster       | $O_i$ | $Q_i$    | $q/t/d$ |
|---------------|-------|----------|---------|
| $^{1,4,4}W_9$ | 1     | +0.00799 | $t_d$   |
|               | 4     | +0.00246 | $d$     |
|               | 7     | -0.00818 | $d$     |
|               | 10    | -0.01029 | $q$     |
|               | 13    | +0.02714 | $t_d$   |
|               | 16    | -0.00519 | $d$     |
|               | 19    | -0.00536 | $t_d$   |
|               | 22    | -0.00070 | $d$     |
|               | 25    | -0.00786 | $d$     |

| cluster          | $O_i$ | $Q_i$    | $q/t/d$ |
|------------------|-------|----------|---------|
| $^{0,6,4}W_{10}$ | 1     | -0.00682 | $t_d$   |
|                  | 4     | +0.00278 | $d$     |
|                  | 7     | -0.00227 | $d$     |
|                  | 10    | +0.00526 | $t_a$   |
|                  | 13    | +0.00056 | $t_a$   |
|                  | 16    | +0.00093 | $t_d$   |
|                  | 19    | -0.00002 | $t_a$   |
|                  | 22    | +0.00036 | $t_d$   |
|                  | 25    | -0.00358 | $d$     |
|                  | 28    | +0.00278 | $d$     |

| cluster          | $O_i$ | $Q_i$    | $q/t/d$ |
|------------------|-------|----------|---------|
| $^{1,4,5}W_{10}$ | 1     | -0.00493 | $t_d$   |
|                  | 4     | +0.00107 | $d$     |
|                  | 7     | +0.00319 | $d$     |
|                  | 10    | -0.01207 | $q$     |
|                  | 13    | +0.02045 | $t_a$   |

|  |    |          |       |
|--|----|----------|-------|
|  | 16 | +0.00393 | $t_a$ |
|  | 19 | −0.00788 | $t_d$ |
|  | 22 | −0.00152 | $d$   |
|  | 25 | −0.00093 | $d$   |
|  | 28 | −0.00132 | $d$   |

| cluster                            | $O_i$ | $Q_i$    | $q/t/d$ |
|------------------------------------|-------|----------|---------|
| <sup>3,2,7</sup> $\mathbf{W}_{12}$ | 1     | −0.00067 | $t_d$   |
|                                    | 4     | +0.00131 | $d$     |
|                                    | 7     | +0.00160 | $d$     |
|                                    | 10    | −0.00667 | $q$     |
|                                    | 13    | +0.01490 | $t_a$   |
|                                    | 16    | −0.00695 | $q$     |
|                                    | 19    | −0.00017 | $q$     |
|                                    | 22    | +0.00004 | $d$     |
|                                    | 25    | +0.00352 | $d$     |
|                                    | 28    | −0.00444 | $d$     |
|                                    | 31    | +0.00131 | $d$     |
|                                    | 34    | −0.00378 | $d$     |

| cluster                            | $O_i$ | $Q_i$    | $q/t/d$ |
|------------------------------------|-------|----------|---------|
| <sup>4,8,0</sup> $\mathbf{W}_{12}$ | 1     | −0.01740 | $t_d$   |
|                                    | 4     | +0.02204 | $t_a$   |
|                                    | 7     | −0.01729 | $t_d$   |
|                                    | 10    | +0.02202 | $t_a$   |
|                                    | 13    | −0.00472 | $q$     |
|                                    | 16    | −0.00457 | $q$     |
|                                    | 19    | −0.00466 | $q$     |
|                                    | 22    | −0.00494 | $q$     |
|                                    | 25    | −0.01743 | $t_d$   |
|                                    | 28    | +0.02210 | $t_a$   |
|                                    | 31    | −0.01739 | $t_d$   |
|                                    | 34    | +0.02222 | $t_a$   |

| cluster                            | $O_i$ | $Q_i$    | $q/t/d$ |
|------------------------------------|-------|----------|---------|
| <sup>3,8,3</sup> $\mathbf{W}_{14}$ | 1     | +0.01895 | $t_a$   |
|                                    | 4     | +0.00079 | $t_d$   |
|                                    | 7     | −0.01597 | $t_d$   |
|                                    | 10    | −0.01309 | $t_d$   |

|  |    |          |       |
|--|----|----------|-------|
|  | 13 | +0.01075 | $q$   |
|  | 16 | +0.00979 | $q$   |
|  | 19 | −0.00828 | $q$   |
|  | 22 | +0.00013 | $t_a$ |
|  | 25 | +0.00566 | $t_a$ |
|  | 28 | −0.00950 | $d$   |
|  | 31 | −0.00404 | $d$   |
|  | 34 | −0.00842 | $d$   |
|  | 37 | +0.01367 | $t_a$ |
|  | 40 | −0.00046 | $t_d$ |

| <b>cluster</b>                          | <b><math>O_i</math></b> | <b><math>Q_i</math></b> | <b><math>q/t/d</math></b> |
|-----------------------------------------|-------------------------|-------------------------|---------------------------|
| <sup>4,4,6</sup> <b>W</b> <sub>14</sub> | 1                       | −0.00662                | $t_d$                     |
|                                         | 4                       | −0.00324                | $d$                       |
|                                         | 7                       | +0.00963                | $t_a$                     |
|                                         | 10                      | −0.00636                | $q$                       |
|                                         | 13                      | −0.00107                | $q$                       |
|                                         | 16                      | −0.00414                | $q$                       |
|                                         | 19                      | +0.00264                | $q$                       |
|                                         | 22                      | +0.01427                | $t_a$                     |
|                                         | 25                      | +0.00079                | $d$                       |
|                                         | 28                      | −0.00357                | $d$                       |
|                                         | 31                      | +0.00465                | $d$                       |
|                                         | 34                      | −0.00250                | $d$                       |
|                                         | 37                      | +0.00087                | $d$                       |
|                                         | 40                      | −0.00536                | $t_d$                     |

| <b>cluster</b>                           | <b><math>O_i</math></b> | <b><math>Q_i</math></b> | <b><math>q/t/d</math></b> |
|------------------------------------------|-------------------------|-------------------------|---------------------------|
| <sup>4,12,0</sup> <b>W</b> <sub>16</sub> | 1                       | +0.01923                | $t_a$                     |
|                                          | 4                       | +0.00054                | $t_d$                     |
|                                          | 7                       | −0.01434                | $t_d$                     |
|                                          | 10                      | −0.01171                | $t_a$                     |
|                                          | 13                      | +0.00938                | $q$                       |
|                                          | 16                      | +0.00772                | $q$                       |
|                                          | 19                      | +0.00288                | $q$                       |
|                                          | 22                      | −0.01084                | $q$                       |
|                                          | 25                      | +0.00423                | $t_a$                     |
|                                          | 28                      | +0.00230                | $t_a$                     |
|                                          | 31                      | −0.03123                | $t_d$                     |

|  |    |          |       |
|--|----|----------|-------|
|  | 34 | +0.01684 | $t_a$ |
|  | 37 | +0.01538 | $t_a$ |
|  | 40 | +0.00045 | $t_d$ |
|  | 43 | −0.02058 | $t_d$ |
|  | 46 | +0.00975 | $t_a$ |

| cluster                | $O_i$ | $Q_i$    | $q/t/d$ |
|------------------------|-------|----------|---------|
| $8,0,8\mathbf{W}_{16}$ | 1     | +0.00680 | $q$     |
|                        | 4     | −0.00077 | $d$     |
|                        | 7     | +0.00329 | $d$     |
|                        | 10    | −0.00751 | $q$     |
|                        | 13    | −0.00944 | $q$     |
|                        | 16    | −0.01028 | $q$     |
|                        | 19    | +0.00297 | $q$     |
|                        | 22    | +0.01152 | $q$     |
|                        | 25    | −0.00054 | $d$     |
|                        | 28    | +0.00240 | $d$     |
|                        | 31    | −0.00893 | $q$     |
|                        | 34    | +0.00774 | $q$     |
|                        | 37    | +0.00230 | $d$     |
|                        | 40    | −0.00207 | $d$     |
|                        | 43    | −0.00058 | $d$     |
|                        | 46    | +0.00311 | $d$     |

| cluster                | $O_i$ | $Q_i$    | $q/t/d$ |
|------------------------|-------|----------|---------|
| $8,8,0\mathbf{W}_{16}$ | 1     | −0.01708 | $t_d$   |
|                        | 4     | +0.02232 | $t_a$   |
|                        | 7     | −0.01718 | $t_d$   |
|                        | 10    | +0.02234 | $t_a$   |
|                        | 13    | +0.00000 | $q$     |
|                        | 16    | −0.00517 | $q$     |
|                        | 19    | −0.00005 | $q$     |
|                        | 22    | −0.00524 | $q$     |
|                        | 25    | −0.00530 | $q$     |
|                        | 28    | −0.00010 | $q$     |
|                        | 31    | −0.00530 | $q$     |
|                        | 34    | −0.00007 | $q$     |
|                        | 37    | −0.01706 | $t_d$   |
|                        | 40    | +0.02240 | $t_a$   |

|  |    |          |       |
|--|----|----------|-------|
|  | 43 | -0.01700 | $t_d$ |
|  | 46 | +0.02240 | $t_a$ |

### NRT Bond Order Distributions

| $^{0,0,4}\mathbf{W}_4$ | $i$ | $j$ | $b_{ij}$ | $R_{ij}$ |
|------------------------|-----|-----|----------|----------|
|                        | 1   | 4   | 0.1068   | 2.7401   |
|                        | 1   | 10  | 0.1068   | 2.7401   |
|                        | 4   | 7   | 0.1068   | 2.7401   |
|                        | 7   | 10  | 0.1068   | 2.7401   |

| $^{0,2,4}\mathbf{W}_6$ | $i$ | $j$ | $b_{ij}$ | $R_{ij}$ |
|------------------------|-----|-----|----------|----------|
|                        | 1   | 4   | 0.1365   | 2.6920   |
|                        | 1   | 10  | 0.0389   | 2.9572   |
|                        | 1   | 16  | 0.0813   | 2.7886   |
|                        | 4   | 7   | 0.1302   | 2.6957   |
|                        | 7   | 10  | 0.1351   | 2.6953   |
|                        | 10  | 13  | 0.0804   | 2.8021   |
|                        | 13  | 16  | 0.0873   | 2.7721   |

| $^{1,0,6}\mathbf{W}_7$ | $i$ | $j$ | $b_{ij}$ | $R_{ij}$ |
|------------------------|-----|-----|----------|----------|
|                        | 1   | 4   | 0.1061   | 2.7412   |
|                        | 1   | 10  | 0.0766   | 2.7513   |
|                        | 4   | 7   | 0.1041   | 2.7377   |
|                        | 7   | 10  | 0.0706   | 2.7570   |
|                        | 10  | 13  | 0.0637   | 2.7513   |
|                        | 10  | 19  | 0.0695   | 2.7677   |
|                        | 13  | 16  | 0.0999   | 2.7469   |
|                        | 16  | 19  | 0.1082   | 2.7349   |

| $^{0,4,4}\mathbf{W}_8$ | $i$ | $j$ | $b_{ij}$ | $R_{ij}$ |
|------------------------|-----|-----|----------|----------|
|                        | 1   | 4   | 0.1462   | 2.6785   |
|                        | 1   | 10  | 0.0280   | 3.0224   |
|                        | 1   | 16  | 0.1052   | 2.7426   |
|                        | 4   | 7   | 0.1387   | 2.6792   |
|                        | 7   | 10  | 0.1440   | 2.6812   |
|                        | 10  | 13  | 0.1063   | 2.7521   |
|                        | 13  | 16  | 0.0322   | 2.9885   |
|                        | 13  | 19  | 0.0724   | 2.8228   |
|                        | 16  | 22  | 0.0750   | 2.8075   |
|                        | 19  | 22  | 0.0822   | 2.7822   |

| $^{0,8,0}\mathbf{W}_8$ | $i$ | $j$ | $b_{ij}$ | $R_{ij}$ |
|------------------------|-----|-----|----------|----------|
|                        | 1   | 4   | 0.1533   | 2.6849   |
|                        | 1   | 10  | 0.0271   | 2.8605   |
|                        | 1   | 16  | 0.0261   | 2.8601   |
|                        | 4   | 7   | 0.0283   | 2.8596   |
|                        | 4   | 19  | 0.0247   | 2.8603   |
|                        | 7   | 10  | 0.1534   | 2.6846   |
|                        | 7   | 22  | 0.0283   | 2.8600   |
|                        | 10  | 13  | 0.0267   | 2.8597   |
|                        | 13  | 16  | 0.0276   | 2.8599   |
|                        | 13  | 22  | 0.1535   | 2.6845   |
|                        | 16  | 19  | 0.1534   | 2.6845   |
|                        | 19  | 22  | 0.0247   | 2.8606   |

| $^{1,2,5}\mathbf{W}_8$ | $i$ | $j$ | $b_{ij}$ | $R_{ij}$ |
|------------------------|-----|-----|----------|----------|
|                        | 1   | 4   | 0.1259   | 2.6991   |
|                        | 1   | 10  | 0.0499   | 2.8988   |
|                        | 1   | 22  | 0.0633   | 2.8435   |
|                        | 4   | 7   | 0.1225   | 2.7101   |
|                        | 7   | 10  | 0.1136   | 2.7477   |
|                        | 10  | 13  | 0.1765   | 2.6666   |
|                        | 10  | 19  | 0.0870   | 2.7837   |
|                        | 13  | 16  | 0.0761   | 2.7990   |
|                        | 13  | 22  | 0.0609   | 2.8239   |
|                        | 16  | 19  | 0.0865   | 2.7775   |

| $^{1,4,4}\mathbf{W}_9$ | $i$ | $j$ | $b_{ij}$ | $R_{ij}$ |
|------------------------|-----|-----|----------|----------|
|                        | 1   | 4   | 0.0942   | 2.7519   |
|                        | 1   | 10  | 0.0775   | 2.8377   |
|                        | 1   | 22  | 0.0318   | 2.8918   |
|                        | 4   | 7   | 0.0797   | 2.8139   |
|                        | 7   | 10  | 0.1563   | 2.6300   |
|                        | 7   | 25  | 0.0401   | 2.9047   |
|                        | 10  | 13  | 0.1783   | 2.6516   |
|                        | 10  | 19  | 0.0722   | 2.8307   |
|                        | 13  | 16  | 0.0757   | 2.8002   |
|                        | 13  | 22  | 0.0377   | 2.8904   |
|                        | 16  | 19  | 0.0903   | 2.7557   |
|                        | 19  | 25  | 0.0228   | 2.9178   |

| $^{0,6,4}\mathbf{W}_{10}$ | $i$ | $j$ | $b_{ij}$ | $R_{ij}$ |
|---------------------------|-----|-----|----------|----------|
|                           | 1   | 4   | 0.1489   | 2.6746   |
|                           | 1   | 10  | 0.0257   | 3.0373   |
|                           | 1   | 16  | 0.1112   | 2.7333   |
|                           | 4   | 7   | 0.1417   | 2.6740   |
|                           | 7   | 10  | 0.1465   | 2.6755   |
|                           | 10  | 13  | 0.1137   | 2.7380   |
|                           | 13  | 16  | 0.0230   | 3.0541   |
|                           | 13  | 19  | 0.0948   | 2.7733   |
|                           | 16  | 22  | 0.0963   | 2.7642   |
|                           | 19  | 22  | 0.0303   | 2.9971   |
|                           | 19  | 25  | 0.0695   | 2.8306   |
|                           | 22  | 28  | 0.0720   | 2.8123   |
|                           | 25  | 28  | 0.0797   | 2.7870   |

| $^{1,4,5}\mathbf{W}_{10}$ | $i$ | $j$ | $b_{ij}$ | $R_{ij}$ |
|---------------------------|-----|-----|----------|----------|
|                           | 1   | 4   | 0.1238   | 2.6994   |
|                           | 1   | 10  | 0.0481   | 2.8857   |
|                           | 1   | 22  | 0.0552   | 2.8548   |
|                           | 4   | 7   | 0.1210   | 2.7156   |
|                           | 7   | 10  | 0.0998   | 2.7564   |
|                           | 10  | 13  | 0.2042   | 2.6307   |
|                           | 10  | 19  | 0.1275   | 2.7273   |
|                           | 13  | 16  | 0.1079   | 2.7462   |
|                           | 16  | 19  | 0.0308   | 2.9976   |
|                           | 16  | 25  | 0.0723   | 2.8257   |
|                           | 19  | 28  | 0.0792   | 2.7950   |
|                           | 25  | 28  | 0.0748   | 2.7913   |

| $^{3,2,7}\mathbf{W}_{12}$ | $i$ | $j$ | $b_{ij}$ | $R_{ij}$ |
|---------------------------|-----|-----|----------|----------|
|                           | 1   | 4   | 0.1219   | 2.7018   |
|                           | 1   | 10  | 0.0676   | 2.8712   |
|                           | 1   | 22  | 0.0526   | 2.8394   |
|                           | 4   | 7   | 0.1188   | 2.7178   |
|                           | 7   | 10  | 0.1155   | 2.7455   |
|                           | 10  | 13  | 0.1596   | 2.691    |
|                           | 10  | 19  | 0.0904   | 2.7886   |

|  |    |    |        |        |
|--|----|----|--------|--------|
|  | 13 | 22 | 0.0649 | 2.8186 |
|  | 13 | 16 | 0.0685 | 2.8446 |
|  | 16 | 25 | 0.0720 | 2.7863 |
|  | 16 | 34 | 0.1012 | 2.7519 |
|  | 19 | 28 | 0.0728 | 2.7439 |
|  | 19 | 31 | 0.0944 | 2.7560 |
|  | 25 | 28 | 0.0791 | 2.7684 |
|  | 31 | 34 | 0.0958 | 2.7531 |

—

| $^{3,4,5}\mathbf{W}_{12}$ | $i$ | $j$ | $b_{ij}$ | $R_{ij}$ |
|---------------------------|-----|-----|----------|----------|
|                           | 1   | 4   | 0.0718   | 2.7944   |
|                           | 1   | 10  | 0.0877   | 2.7604   |
|                           | 4   | 7   | 0.1611   | 2.6749   |
|                           | 4   | 13  | 0.0718   | 2.8632   |
|                           | 7   | 16  | 0.0264   | 2.8826   |
|                           | 7   | 22  | 0.0561   | 2.8650   |
|                           | 10  | 13  | 0.0967   | 2.7489   |
|                           | 13  | 16  | 0.1108   | 2.7557   |
|                           | 13  | 19  | 0.0579   | 2.8272   |
|                           | 16  | 22  | 0.0436   | 2.8720   |
|                           | 19  | 22  | 0.1052   | 2.7520   |
|                           | 19  | 25  | 0.0498   | 2.8903   |
|                           | 19  | 31  | 0.1104   | 2.7418   |
|                           | 22  | 28  | 0.0772   | 2.8009   |
|                           | 25  | 28  | 0.0647   | 2.8362   |
|                           | 25  | 34  | 0.1348   | 2.7007   |
|                           | 31  | 34  | 0.1188   | 2.7178   |

| $^{4,8,0}\mathbf{W}_{12}$ | $i$ | $j$ | $b_{ij}$ | $R_{ij}$ |
|---------------------------|-----|-----|----------|----------|
|                           | 1   | 4   | 0.1475   | 2.6949   |
|                           | 1   | 10  | 0.0561   | 2.8813   |
|                           | 1   | 16  | 0.0538   | 2.8392   |
|                           | 4   | 7   | 0.0560   | 2.8820   |
|                           | 4   | 19  | 0.0394   | 2.8570   |
|                           | 7   | 10  | 0.1475   | 2.6947   |
|                           | 7   | 22  | 0.0541   | 2.8380   |
|                           | 10  | 13  | 0.0394   | 2.8575   |
|                           | 13  | 16  | 0.1082   | 2.7784   |

|  |    |    |        |        |
|--|----|----|--------|--------|
|  | 13 | 22 | 0.1078 | 2.7795 |
|  | 13 | 25 | 0.0542 | 2.8380 |
|  | 16 | 19 | 0.1081 | 2.7785 |
|  | 16 | 28 | 0.0395 | 2.8572 |
|  | 19 | 22 | 0.1079 | 2.7789 |
|  | 19 | 31 | 0.0538 | 2.8384 |
|  | 22 | 34 | 0.0392 | 2.8585 |
|  | 25 | 28 | 0.1478 | 2.6943 |
|  | 25 | 34 | 0.0561 | 2.8831 |
|  | 28 | 31 | 0.0560 | 2.8826 |

| $^{3,8,3}\mathbf{W}_{14}$ | $i$ | $j$ | $b_{ij}$ | $R_{ij}$ |
|---------------------------|-----|-----|----------|----------|
|                           | 1   | 4   | 0.0479   | 2.8915   |
|                           | 1   | 10  | 0.1394   | 2.6919   |
|                           | 1   | 40  | 0.0513   | 2.8748   |
|                           | 4   | 7   | 0.0832   | 2.7877   |
|                           | 4   | 13  | 0.0480   | 2.8933   |
|                           | 7   | 16  | 0.1956   | 2.6317   |
|                           | 7   | 40  | 0.0832   | 2.7941   |
|                           | 10  | 13  | 0.0652   | 2.8334   |
|                           | 10  | 37  | 0.0475   | 2.9123   |
|                           | 13  | 19  | 0.0456   | 2.8578   |
|                           | 16  | 22  | 0.0345   | 2.9366   |
|                           | 19  | 22  | 0.0674   | 2.8305   |
|                           | 19  | 25  | 0.0640   | 2.8759   |
|                           | 19  | 31  | 0.1063   | 2.7518   |
|                           | 22  | 28  | 0.1017   | 2.7621   |
|                           | 25  | 28  | 0.0752   | 2.8198   |
|                           | 25  | 34  | 0.1410   | 2.6906   |

| $^{4,4,6}\mathbf{W}_{14}$ | $i$ | $j$ | $b_{ij}$ | $R_{ij}$ |
|---------------------------|-----|-----|----------|----------|
|                           | 1   | 4   | 0.1223   | 2.6972   |
|                           | 1   | 10  | 0.0638   | 2.8562   |
|                           | 1   | 22  | 0.0495   | 2.9173   |
|                           | 4   | 7   | 0.1301   | 2.7127   |
|                           | 7   | 10  | 0.0655   | 2.8861   |
|                           | 7   | 40  | 0.0490   | 2.9332   |
|                           | 10  | 13  | 0.1148   | 2.7789   |
|                           | 13  | 16  | 0.0923   | 2.7808   |

|  |    |    |        |        |
|--|----|----|--------|--------|
|  | 13 | 40 | 0.1148 | 2.6940 |
|  | 16 | 19 | 0.0937 | 2.8005 |
|  | 16 | 25 | 0.0901 | 2.7772 |
|  | 16 | 34 | 0.0923 | 2.7725 |
|  | 19 | 28 | 0.0997 | 2.7415 |
|  | 19 | 31 | 0.0984 | 2.7440 |
|  | 22 | 37 | 0.0666 | 2.8167 |
|  | 25 | 28 | 0.0839 | 2.7599 |
|  | 31 | 34 | 0.0900 | 2.7594 |
|  | 37 | 40 | 0.0616 | 2.8367 |

| $4,12,0\mathbf{W}_{16}$ | $i$ | $j$ | $b_{ij}$ | $R_{ij}$ |
|-------------------------|-----|-----|----------|----------|
|                         | 1   | 4   | 0.0460   | 2.8980   |
|                         | 1   | 10  | 0.1399   | 2.6902   |
|                         | 1   | 40  | 0.0501   | 2.8739   |
|                         | 4   | 7   | 0.0819   | 2.7894   |
|                         | 4   | 13  | 0.0492   | 2.8935   |
|                         | 7   | 16  | 0.1893   | 2.6394   |
|                         | 7   | 40  | 0.0819   | 2.7994   |
|                         | 10  | 13  | 0.0710   | 2.8210   |
|                         | 10  | 37  | 0.0461   | 2.9147   |
|                         | 13  | 19  | 0.0481   | 2.8574   |
|                         | 16  | 22  | 0.0379   | 2.9047   |
|                         | 16  | 37  | 0.1127   | 2.7430   |
|                         | 19  | 22  | 0.1045   | 2.7846   |
|                         | 19  | 25  | 0.0288   | 2.9592   |
|                         | 19  | 31  | 0.0768   | 2.7963   |
|                         | 22  | 28  | 0.0447   | 2.8969   |
|                         | 22  | 46  | 0.0739   | 2.8280   |
|                         | 25  | 28  | 0.0855   | 2.8269   |
|                         | 25  | 34  | 0.1175   | 2.7624   |
|                         | 28  | 43  | 0.0437   | 2.9257   |
|                         | 31  | 34  | 0.1998   | 2.6290   |
|                         | 31  | 46  | 0.0509   | 2.8990   |
|                         | 34  | 43  | 0.0484   | 2.8842   |
|                         | 37  | 40  | 0.0354   | 2.9494   |
|                         | 43  | 46  | 0.1407   | 2.7047   |

| $8,0,8\mathbf{W}_{16}$ | $i$ | $j$ | $b_{ij}$ | $R_{ij}$ |
|------------------------|-----|-----|----------|----------|
|                        | 1   | 4   | 0.0951   | 2.7445   |
|                        | 1   | 10  | 0.1161   | 2.7665   |
|                        | 1   | 22  | 0.0691   | 2.7757   |
|                        | 1   | 31  | 0.0819   | 2.7822   |
|                        | 4   | 7   | 0.0975   | 2.7630   |
|                        | 7   | 10  | 0.0690   | 2.7731   |
|                        | 10  | 13  | 0.0707   | 2.8545   |
|                        | 10  | 19  | 0.0846   | 2.8208   |
|                        | 13  | 16  | 0.0818   | 2.8054   |
|                        | 13  | 22  | 0.1076   | 2.7763   |
|                        | 13  | 40  | 0.0901   | 2.7615   |
|                        | 16  | 19  | 0.1005   | 2.8240   |
|                        | 16  | 25  | 0.0842   | 2.7734   |
|                        | 16  | 34  | 0.0789   | 2.7921   |
|                        | 19  | 28  | 0.0759   | 2.7644   |
|                        | 19  | 31  | 0.0890   | 2.7870   |
|                        | 22  | 34  | 0.0778   | 2.7782   |
|                        | 22  | 37  | 0.0942   | 2.7332   |
|                        | 25  | 28  | 0.0896   | 2.7629   |
|                        | 31  | 34  | 0.1009   | 2.8178   |
|                        | 31  | 43  | 0.0854   | 2.7708   |
|                        | 34  | 46  | 0.0780   | 2.7668   |
|                        | 37  | 40  | 0.0862   | 2.7714   |
|                        | 43  | 46  | 0.0911   | 2.7610   |

| $8,8,0\mathbf{W}_{16}$ | $i$ | $j$ | $b_{ij}$ | $R_{ij}$ |
|------------------------|-----|-----|----------|----------|
|                        | 1   | 4   | 0.1494   | 2.6919   |
|                        | 1   | 10  | 0.0347   | 2.8823   |
|                        | 1   | 16  | 0.0409   | 2.8353   |
|                        | 4   | 7   | 0.0429   | 2.8823   |
|                        | 4   | 19  | 0.0405   | 2.8562   |
|                        | 7   | 10  | 0.1494   | 2.6919   |
|                        | 7   | 22  | 0.0411   | 2.8354   |
|                        | 10  | 13  | 0.0405   | 2.8560   |
|                        | 13  | 16  | 0.0997   | 2.7928   |
|                        | 13  | 22  | 0.1050   | 2.7922   |
|                        | 13  | 25  | 0.0387   | 2.8358   |
|                        | 16  | 19  | 0.1050   | 2.7921   |

|  |    |    |        |        |
|--|----|----|--------|--------|
|  | 16 | 28 | 0.0390 | 2.8358 |
|  | 19 | 22 | 0.0997 | 2.7929 |
|  | 19 | 31 | 0.0389 | 2.8354 |
|  | 22 | 34 | 0.0387 | 2.8362 |
|  | 25 | 28 | 0.1005 | 2.7929 |
|  | 25 | 34 | 0.1053 | 2.7912 |
|  | 25 | 37 | 0.0371 | 2.8353 |
|  | 28 | 31 | 0.1049 | 2.7922 |
|  | 28 | 46 | 0.0405 | 2.8578 |
|  | 31 | 43 | 0.0367 | 2.8352 |
|  | 34 | 40 | 0.0405 | 2.8561 |
|  | 37 | 40 | 0.1495 | 2.6920 |
|  | 37 | 46 | 0.0342 | 2.8825 |
|  | 40 | 43 | 0.0336 | 2.8830 |
|  | 43 | 46 | 0.1492 | 2.6925 |

## Optimized Cluster Geometries

```

%nproc=8
%chk=w2
%mem=2GB
#B3LYP/6-311++G** POP=NBO6Read

water dimer, E(RB3LYP) = -152.926350055 (dE = -5.83 kcal/mol)
nu: 144,165,175,...
Vibrational temperatures:    206.49    237.01    251.99    283.88    534.25
      (Kelvin)              968.26   2320.93   2344.01   5331.39   5488.10
                          5600.08   5632.57

Zero-point correction=                0.046234 (Hartree/Particle)
Thermal correction to Energy=          0.051973
Thermal correction to Enthalpy=        0.052917
Thermal correction to Gibbs Free Energy= 0.020146
Sum of electronic and zero-point Energies= -152.880116
Sum of electronic and thermal Energies=    -152.874377
Sum of electronic and thermal Enthalpies=   -152.873433
Sum of electronic and thermal Free Energies= -152.906204

  0  1
  H
  O    1    0.9681
  H    2    0.9775    1    105.8230
  O    3    1.9059    2    171.3648    1    180.0262
  H    4    0.9698    3    109.7952    2    57.8695
  H    4    0.9698    3    109.7952    2    302.0524

$NBO file=water_dimer archive dipole nrt plot $END

*****
%mem=2gb
%nprocshared=8
%chk=w4c
#b3lyp/6-311++G** pop=nbo7read

w4c, E(RB3LYP) = -305.883182879
nu: 56,92,212,...
Vibrational temperatures:    80.50    132.86    305.24    315.75    353.06
      (Kelvin)              353.07    373.97    377.79    377.80    447.25
                          594.34    642.43    674.69    674.71    1138.90
                          1214.13   1214.13   1461.70   2346.80   2371.02
                          2371.03   2418.89   4856.35   4991.12   4991.13
                          5045.49   5588.27   5589.36   5589.36   5590.89

Zero-point correction=                0.098934 (Hartree/Particle)
Thermal correction to Energy=          0.108534
Thermal correction to Enthalpy=        0.109478
Thermal correction to Gibbs Free Energy= 0.065929
Sum of electronic and zero-point Energies= -305.784248
Sum of electronic and thermal Energies=    -305.774649
Sum of electronic and thermal Enthalpies=   -305.773704
Sum of electronic and thermal Free Energies= -305.817254

  0  1
      8      -0.043224    1.936641    0.028239
      1      -0.824062    1.339305   -0.004245
      1      -0.196073    2.541087    0.760117
      8      -1.936652   -0.043224   -0.028238
      1      -1.339311   -0.824059    0.004247
      1      -2.541094   -0.196075   -0.760120
      8       0.043225   -1.936640    0.028239
      1       0.824061   -1.339300   -0.004243
      1       0.196076   -2.541087    0.760116
      8       1.936656    0.043224   -0.028235

```

```

1          1.339308    0.824055    0.004252
1          2.541050    0.196070   -0.760157

$nb0 file=w4c archive nrt plot $end

*****
%mem=2gb
%nprocshared=8
%chk=w6_q0_t2_d4
#b3lyp/6-311++G** pop=nbo7read

w6_q0_t2_d4 ("2-pane"), E(RB3LYP) = -458.831339373
nu: 32,44,62,...
Vibrational temperatures:   46.06    62.70    89.36    112.32    141.90
(Kelvin)                   212.21   262.12   284.37   300.12   336.45
                           356.55   366.68   380.12   416.18   422.01
                           435.32   462.58   574.56   599.63   663.11
                           679.58   714.43   804.39   902.73  1085.48
                           1128.82  1238.68  1266.92  1330.31  1507.48
                           2343.30  2360.76  2364.51  2393.65  2420.78
                           2471.52  4696.19  4809.84  4887.12  5042.15
                           5126.96  5152.88  5356.38  5576.31  5588.87
                           5591.25  5591.77  5593.75
Zero-point correction=      0.149713 (Hartree/Particle)
Thermal correction to Energy= 0.164610
Thermal correction to Enthalpy= 0.165554
Thermal correction to Gibbs Free Energy= 0.108550
Sum of electronic and zero-point Energies= -458.681627
Sum of electronic and thermal Energies= -458.666730
Sum of electronic and thermal Enthalpies= -458.665786
Sum of electronic and thermal Free Energies= -458.722789

0 1
8          -0.102847    1.546527    0.865219
1          -0.954782    1.531691    0.359698
1          -0.244471    2.119056    1.625438
8          -2.429522    1.232050   -0.451817
1          -2.526997    0.248670   -0.487527
1          -2.610745    1.555085   -1.338990
8          -2.336467   -1.462044   -0.437681
1          -1.462734   -1.586579    0.010730
1          -2.954645   -2.053823    0.000041
8          0.015314   -1.408329    0.878002
1          0.057314   -0.465780    1.104985
1          0.864936   -1.587018    0.427081
8          2.498662   -1.404974   -0.419934
1          2.585015   -0.432334   -0.497755
1          3.313569   -1.714925   -0.014822
8          2.360444    1.363630   -0.429104
1          1.494977    1.540541   -0.007352
1          2.393883    1.910541   -1.219010

$nb0 file=w6_q0_t2_d4 archive nrt plot $end

*****
%mem=2gb
%nprocshared=8
%chk=w8_q0_t4_d4
#b3lyp/6-311++G** pop=nbo7read

w8_q0_t4_d4 ("4-pane ladder"), E(RB3LYP) = -611.777396076
nu: 20,29,44,...
Vibrational temperatures:   28.53    41.47    63.82    70.85    73.77
(Kelvin)                   104.98   131.19   142.29   177.42   201.13
                           245.72   261.18   292.88   316.98   342.38
                           351.78   355.64   371.20   387.50   412.54

```

|         |         |         |         |         |
|---------|---------|---------|---------|---------|
| 420.18  | 435.69  | 453.38  | 467.01  | 550.74  |
| 583.17  | 655.72  | 670.18  | 690.44  | 722.68  |
| 744.34  | 783.06  | 867.10  | 915.43  | 1040.48 |
| 1092.99 | 1210.04 | 1223.58 | 1241.15 | 1319.50 |
| 1370.98 | 1528.39 | 2341.44 | 2355.17 | 2361.50 |
| 2379.03 | 2401.28 | 2428.17 | 2448.10 | 2481.53 |
| 4627.88 | 4745.79 | 4835.93 | 4943.26 | 4990.94 |
| 5082.10 | 5163.22 | 5190.01 | 5399.34 | 5415.36 |
| 5574.19 | 5576.54 | 5588.85 | 5592.42 | 5592.47 |
| 5593.86 |         |         |         |         |

Zero-point correction= 0.200250 (Hartree/Particle)  
 Thermal correction to Energy= 0.220627  
 Thermal correction to Enthalpy= 0.221571  
 Thermal correction to Gibbs Free Energy= 0.150633  
 Sum of electronic and zero-point Energies= -611.577146  
 Sum of electronic and thermal Energies= -611.556769  
 Sum of electronic and thermal Enthalpies= -611.555825  
 Sum of electronic and thermal Free Energies= -611.626764

0 1

|   |           |           |           |
|---|-----------|-----------|-----------|
| 8 | 1.215665  | 1.581900  | -0.767618 |
| 1 | 2.113017  | 1.506917  | -0.348896 |
| 1 | 1.317630  | 2.167450  | -1.524278 |
| 8 | 3.646856  | 1.172786  | 0.279516  |
| 1 | 3.749541  | 0.187304  | 0.275238  |
| 1 | 3.934382  | 1.472100  | 1.146682  |
| 8 | 3.560690  | -1.504197 | 0.212302  |
| 1 | 2.642354  | -1.619614 | -0.144779 |
| 1 | 4.127063  | -2.096062 | -0.290429 |
| 8 | 1.095055  | -1.437270 | -0.838802 |
| 1 | 1.017738  | -0.503416 | -1.082249 |
| 1 | 0.303570  | -1.606179 | -0.279255 |
| 8 | -1.119606 | -1.453350 | 0.794869  |
| 1 | -1.144067 | -0.513638 | 1.028794  |
| 1 | -2.012160 | -1.639640 | 0.444599  |
| 8 | -1.035024 | 1.533962  | 0.798895  |
| 1 | -0.221045 | 1.618999  | 0.251392  |
| 1 | -0.903556 | 2.090449  | 1.572856  |
| 8 | -3.758374 | -1.467490 | -0.207505 |
| 1 | -3.858477 | -0.497125 | -0.282184 |
| 1 | -4.515743 | -1.777775 | 0.296793  |
| 8 | -3.618952 | 1.310353  | -0.275865 |
| 1 | -2.713709 | 1.487740  | 0.047531  |
| 1 | -3.727018 | 1.828946  | -1.078155 |

\$nbo file=w8\_q0\_t4\_d4 archive nrt plot \$end

\*\*\*\*\*

```

%mem=2gb
%nprocshared=8
%chk=w10_q0_t6_d4
#b3lyp/6-311++G** pop=nbo7read

w10_q0_t6_d4 ("4-pane ladder"), E(RB3LYP) = -764.722600374
nu: 12,20,30,...
Vibrational temperatures: 17.36 28.17 42.85 60.96 61.79
(Kelvin) 68.50 69.05 104.55 122.05 129.59
141.86 157.77 177.62 198.23 240.99
253.12 287.70 290.47 312.33 330.94
353.83 361.44 365.00 385.19 395.34
399.78 405.11 418.46 436.32 459.70
473.72 539.96 574.63 634.91 650.85
668.78 694.33 712.31 726.98 748.86
761.91 860.06 878.46 886.12 1020.98
1080.59 1147.25 1209.55 1221.09 1249.20
1268.50 1338.10 1389.34 1535.08 2339.94

```

|                                              |         |         |         |             |                    |
|----------------------------------------------|---------|---------|---------|-------------|--------------------|
|                                              | 2352.90 | 2359.32 | 2370.62 | 2390.23     | 2410.26            |
|                                              | 2426.33 | 2438.64 | 2463.28 | 2483.89     | 4605.94            |
|                                              | 4725.20 | 4818.23 | 4895.19 | 4940.75     | 5005.39            |
|                                              | 5054.06 | 5099.77 | 5178.77 | 5204.54     | 5416.77            |
|                                              | 5427.47 | 5450.79 | 5573.47 | 5575.30     | 5577.34            |
|                                              | 5588.82 | 5592.31 | 5593.03 | 5594.45     |                    |
| Zero-point correction=                       |         |         |         | 0.250654    | (Hartree/Particle) |
| Thermal correction to Energy=                |         |         |         | 0.276622    |                    |
| Thermal correction to Enthalpy=              |         |         |         | 0.277566    |                    |
| Thermal correction to Gibbs Free Energy=     |         |         |         | 0.192293    |                    |
| Sum of electronic and zero-point Energies=   |         |         |         | -764.471946 |                    |
| Sum of electronic and thermal Energies=      |         |         |         | -764.445978 |                    |
| Sum of electronic and thermal Enthalpies=    |         |         |         | -764.445034 |                    |
| Sum of electronic and thermal Free Energies= |         |         |         | -764.530307 |                    |

0 1

|   |           |           |           |
|---|-----------|-----------|-----------|
| 8 | -2.471232 | 1.568119  | 0.747501  |
| 1 | -3.318946 | 1.482375  | 0.236016  |
| 1 | -2.661100 | 2.151721  | 1.488549  |
| 8 | -4.777481 | 1.150454  | -0.541081 |
| 1 | -4.886152 | 0.164924  | -0.545500 |
| 1 | -4.980676 | 1.450039  | -1.431684 |
| 8 | -4.715089 | -1.521855 | -0.467714 |
| 1 | -3.837792 | -1.641738 | -0.018955 |
| 1 | -5.331434 | -2.115431 | -0.030031 |
| 8 | -2.372818 | -1.466510 | 0.826545  |
| 1 | -2.317059 | -0.537597 | 1.091368  |
| 1 | -1.528093 | -1.629696 | 0.345702  |
| 8 | -0.019568 | -1.487801 | -0.572809 |
| 1 | 0.040171  | -0.562465 | -0.846399 |
| 1 | 0.833040  | -1.659679 | -0.117701 |
| 8 | -0.081844 | 1.565700  | -0.579869 |
| 1 | -0.946886 | 1.612113  | -0.108637 |
| 1 | -0.172661 | 2.113243  | -1.365969 |
| 8 | 2.405067  | -1.496081 | 0.773392  |
| 1 | 2.455412  | -0.557616 | 1.005576  |
| 1 | 3.250483  | -1.679235 | 0.320995  |
| 8 | 2.312164  | 1.499418  | 0.800456  |
| 1 | 1.451278  | 1.576590  | 0.332830  |
| 1 | 2.242621  | 2.038427  | 1.594563  |
| 8 | 4.931225  | -1.494584 | -0.503730 |
| 1 | 5.034977  | -0.523679 | -0.556177 |
| 1 | 5.728384  | -1.828032 | -0.082304 |
| 8 | 4.808463  | 1.289569  | -0.477628 |
| 1 | 3.931187  | 1.461529  | -0.083731 |
| 1 | 4.862147  | 1.832771  | -1.269015 |

\$nbo file=w10\_q0\_t6\_d4 archive nrt plot \$end

\*\*\*\*\*

```
%mem=2gb
%nprocshared=8
%chk=w9_q1_t4_d4
#b3lyp/6-311++G** pop=nbo7read opt freq
```

w9\_4\_pane (w9\_q1\_t4\_d4 "saddle"), E(RB3LYP) = -688.246307864

nu: 12,25,37,...

| Vibrational temperatures: | 17.43   | 36.33   | 53.52   | 64.71   | 76.51   |
|---------------------------|---------|---------|---------|---------|---------|
| (Kelvin)                  | 89.50   | 99.32   | 123.19  | 136.20  | 143.81  |
|                           | 175.14  | 212.81  | 235.56  | 254.25  | 273.68  |
|                           | 283.67  | 287.03  | 316.11  | 323.58  | 327.82  |
|                           | 341.22  | 375.10  | 387.72  | 405.36  | 438.77  |
|                           | 461.79  | 495.23  | 539.46  | 567.19  | 612.22  |
|                           | 629.80  | 665.78  | 692.62  | 767.62  | 772.45  |
|                           | 791.03  | 811.41  | 956.57  | 1008.13 | 1035.62 |
|                           | 1073.07 | 1118.50 | 1153.30 | 1178.36 | 1221.82 |

|  |         |         |         |         |         |
|--|---------|---------|---------|---------|---------|
|  | 1250.36 | 1407.33 | 1568.05 | 2315.21 | 2352.42 |
|  | 2360.46 | 2370.21 | 2381.74 | 2387.02 | 2402.71 |
|  | 2412.35 | 2492.27 | 4443.79 | 4777.17 | 4877.14 |
|  | 4954.01 | 5006.41 | 5125.07 | 5175.52 | 5207.92 |
|  | 5259.38 | 5316.47 | 5373.55 | 5495.09 | 5562.42 |
|  | 5568.98 | 5573.84 | 5591.00 | 5596.27 | 5597.96 |

Zero-point correction= 0.225212 (Hartree/Parti\$  
 Thermal correction to Energy= 0.248483  
 Thermal correction to Enthalpy= 0.249427  
 Thermal correction to Gibbs Free Energy= 0.171104  
 Sum of electronic and zero-point Energies= -688.021096  
 Sum of electronic and thermal Energies= -687.997825  
 Sum of electronic and thermal Enthalpies= -687.996881  
 Sum of electronic and thermal Free Energies= -688.075204

|   |   |           |           |           |  |
|---|---|-----------|-----------|-----------|--|
| 0 | 1 |           |           |           |  |
|   | 8 | 0.131053  | -2.498922 | -1.052882 |  |
|   | 1 | 1.078473  | -2.594556 | -0.807112 |  |
|   | 1 | 0.110244  | -2.388383 | -2.009173 |  |
|   | 8 | 2.738637  | -2.306524 | -0.194697 |  |
|   | 1 | 2.824623  | -1.449619 | 0.272634  |  |
|   | 1 | 3.566700  | -2.452947 | -0.660400 |  |
|   | 8 | 2.511496  | 0.146091  | 1.165794  |  |
|   | 1 | 1.521992  | 0.091597  | 1.057778  |  |
|   | 1 | 2.684216  | 0.101866  | 2.111960  |  |
|   | 8 | -0.009101 | -0.100293 | 0.456886  |  |
|   | 1 | -0.055396 | -0.898067 | -0.101622 |  |
|   | 1 | -0.908061 | -0.019878 | 0.882922  |  |
|   | 8 | -2.542058 | 0.055159  | 1.225616  |  |
|   | 1 | -2.850282 | 0.817597  | 0.695451  |  |
|   | 1 | -2.852951 | -0.756293 | 0.791284  |  |
|   | 8 | -2.853785 | 2.350301  | -0.348011 |  |
|   | 1 | -1.934415 | 2.522623  | -0.647545 |  |
|   | 1 | -3.214294 | 3.197920  | -0.074785 |  |
|   | 8 | -0.194190 | 2.278638  | -1.066041 |  |
|   | 1 | -0.074543 | 1.414737  | -0.629839 |  |
|   | 1 | 0.649058  | 2.730016  | -0.904888 |  |
|   | 8 | -2.570862 | -2.551145 | -0.023578 |  |
|   | 1 | -1.658023 | -2.729908 | -0.305110 |  |
|   | 1 | -2.906322 | -3.376444 | 0.337663  |  |
|   | 8 | 2.569675  | 2.693908  | -0.228034 |  |
|   | 1 | 2.703105  | 1.875183  | 0.282204  |  |
|   | 1 | 3.068956  | 3.376846  | 0.228153  |  |

\$nbo file=w9\_q1\_t4\_d4 archive nrt plot thresh=1.4 \$end

\*\*\*\*\*

%mem=2gb  
 %nprocshared=8  
 %chk=w8\_t8  
 #b3lyp/6-311++G\*\* pop=nbo7read

w8\_t8 ("cube"), E(RB3LYP) = -611.792369303

nu: 81,83,85,...

|                           |         |         |         |         |         |
|---------------------------|---------|---------|---------|---------|---------|
| Vibrational temperatures: | 116.05  | 119.09  | 122.16  | 124.99  | 125.05  |
| (Kelvin)                  | 182.83  | 230.44  | 241.33  | 250.51  | 250.63  |
|                           | 272.63  | 296.27  | 296.41  | 298.01  | 384.08  |
|                           | 393.58  | 393.67  | 418.81  | 421.40  | 437.91  |
|                           | 501.50  | 501.59  | 644.41  | 663.34  | 663.46  |
|                           | 752.98  | 757.78  | 792.28  | 801.16  | 801.29  |
|                           | 887.53  | 1008.12 | 1008.53 | 1014.50 | 1065.17 |
|                           | 1065.27 | 1109.30 | 1284.20 | 1346.12 | 1516.02 |
|                           | 1516.49 | 1616.43 | 2355.35 | 2356.90 | 2356.91 |
|                           | 2374.79 | 2411.59 | 2411.71 | 2449.30 | 2480.70 |
|                           | 4622.93 | 4657.52 | 4658.30 | 4744.90 | 5199.81 |
|                           | 5199.92 | 5222.88 | 5227.18 | 5248.45 | 5248.70 |

```

5312.94 5312.97 5579.80 5579.96 5580.04
5580.50
Zero-point correction= 0.204049 (Hartree/Particle)
Thermal correction to Energy= 0.222157
Thermal correction to Enthalpy= 0.223101
Thermal correction to Gibbs Free Energy= 0.161017
Sum of electronic and zero-point Energies= -611.588320
Sum of electronic and thermal Energies= -611.570213
Sum of electronic and thermal Enthalpies= -611.569268
Sum of electronic and thermal Free Energies= -611.631352

```

0 1

|   |           |           |           |
|---|-----------|-----------|-----------|
| 8 | 2.082972  | 0.137875  | -1.345066 |
| 1 | 2.178068  | 0.140096  | -0.355425 |
| 1 | 2.968129  | 0.194557  | -1.717317 |
| 8 | 1.952156  | 0.119848  | 1.336558  |
| 1 | 1.346677  | 0.853935  | 1.546015  |
| 1 | 1.446927  | -0.687727 | 1.541240  |
| 8 | -0.137979 | 2.071318  | 1.359495  |
| 1 | -0.140516 | 2.174413  | 0.370574  |
| 1 | -0.193407 | 2.953527  | 1.738862  |
| 8 | -0.119835 | 1.962628  | -1.322889 |
| 1 | 0.687908  | 1.459142  | -1.531057 |
| 1 | -0.853817 | 1.358315  | -1.536110 |
| 8 | -2.071050 | -0.127565 | -1.361248 |
| 1 | -2.174732 | -0.138096 | -0.372445 |
| 1 | -2.952894 | -0.181221 | -1.741711 |
| 8 | 0.130806  | -1.952417 | -1.334686 |
| 1 | -0.674714 | -1.446603 | -1.545973 |
| 1 | 0.867076  | -1.347821 | -1.538817 |
| 8 | 0.126437  | -2.081968 | 1.346666  |
| 1 | 0.137754  | -2.177313 | 0.357046  |
| 1 | 0.182379  | -2.966759 | 1.719867  |
| 8 | -1.964035 | -0.129493 | 1.321120  |
| 1 | -1.459143 | 0.675789  | 1.535493  |
| 1 | -1.361471 | -0.866040 | 1.530151  |

\$nbo file=w8\_t8 archive nrt plot \$end

\*\*\*\*\*

```

%mem=2gb
%nprocshared=8
%chk=w12_q4_t8
#b3lyp/6-311++G** pop=nbo7read

```

w12\_q4\_t8 ("2-cube"), E(RB3LYP) = -917.699234818

nu: 59,61(2),78(2),...

| Vibrational temperatures:<br>(Kelvin) | 84.29   | 87.48   | 87.49   | 112.07  | 112.09  |
|---------------------------------------|---------|---------|---------|---------|---------|
|                                       | 124.64  | 129.42  | 133.17  | 156.70  | 170.63  |
|                                       | 176.95  | 189.18  | 189.37  | 227.98  | 244.75  |
|                                       | 245.78  | 250.95  | 251.42  | 294.23  | 297.54  |
|                                       | 306.91  | 307.17  | 353.70  | 370.02  | 370.32  |
|                                       | 371.89  | 379.43  | 384.70  | 401.04  | 401.32  |
|                                       | 461.12  | 480.89  | 488.98  | 489.24  | 637.00  |
|                                       | 665.15  | 673.70  | 673.80  | 732.44  | 751.09  |
|                                       | 760.87  | 761.34  | 761.71  | 791.61  | 824.49  |
|                                       | 824.67  | 843.91  | 953.05  | 982.89  | 988.96  |
|                                       | 989.23  | 995.04  | 1039.46 | 1040.15 | 1041.82 |
|                                       | 1066.14 | 1066.64 | 1215.10 | 1232.98 | 1233.28 |
|                                       | 1289.40 | 1436.87 | 1437.42 | 1518.20 | 1553.55 |
|                                       | 1577.44 | 2359.08 | 2359.11 | 2365.07 | 2367.94 |
|                                       | 2396.68 | 2399.88 | 2399.92 | 2425.21 | 2459.96 |
|                                       | 2461.35 | 2461.48 | 2496.16 | 4661.82 | 4665.26 |
|                                       | 4718.75 | 4719.83 | 4858.27 | 4990.26 | 4990.61 |
|                                       | 5047.93 | 5216.46 | 5221.54 | 5221.94 | 5223.23 |
|                                       | 5256.65 | 5263.12 | 5263.58 | 5267.93 | 5332.12 |

|                                              |         |         |             |                    |         |
|----------------------------------------------|---------|---------|-------------|--------------------|---------|
|                                              | 5333.64 | 5334.11 | 5342.74     | 5576.89            | 5577.08 |
|                                              | 5577.26 | 5577.59 |             |                    |         |
| Zero-point correction=                       |         |         | 0.308262    | (Hartree/Particle) |         |
| Thermal correction to Energy=                |         |         | 0.335615    |                    |         |
| Thermal correction to Enthalpy=              |         |         | 0.336560    |                    |         |
| Thermal correction to Gibbs Free Energy=     |         |         | 0.254260    |                    |         |
| Sum of electronic and zero-point Energies=   |         |         | -917.390973 |                    |         |
| Sum of electronic and thermal Energies=      |         |         | -917.363619 |                    |         |
| Sum of electronic and thermal Enthalpies=    |         |         | -917.362675 |                    |         |
| Sum of electronic and thermal Free Energies= |         |         | -917.444975 |                    |         |

0 1

|   |           |           |           |
|---|-----------|-----------|-----------|
| 8 | -2.887376 | -1.734013 | -1.034863 |
| 1 | -2.939569 | -0.804219 | -1.381025 |
| 1 | -3.566769 | -2.242276 | -1.488415 |
| 8 | -2.804543 | 0.872889  | -1.712763 |
| 1 | -2.935032 | 1.342788  | -0.869352 |
| 1 | -1.889967 | 1.072107  | -1.977073 |
| 8 | -2.885812 | 1.733393  | 1.036614  |
| 1 | -2.937688 | 0.803415  | 1.382355  |
| 1 | -3.563155 | 2.241996  | 1.492849  |
| 8 | -2.802254 | -0.873537 | 1.713671  |
| 1 | -2.932814 | -1.343217 | 0.870096  |
| 1 | -1.887877 | -1.073168 | 1.978263  |
| 8 | 0.054756  | -0.861769 | 1.763770  |
| 1 | 0.058007  | 0.100220  | 1.561214  |
| 1 | 0.965392  | -1.065423 | 2.042908  |
| 8 | -0.053610 | -1.763313 | -0.862103 |
| 1 | -0.059484 | -1.559371 | 0.099651  |
| 1 | -0.962762 | -2.046173 | -1.066767 |
| 8 | 0.052027  | 0.862683  | -1.763940 |
| 1 | 0.056107  | -0.099119 | -1.560289 |
| 1 | 0.961733  | 1.066012  | -2.046104 |
| 8 | -0.053340 | 1.765199  | 0.862247  |
| 1 | -0.964259 | 2.044534  | 1.064280  |
| 1 | -0.055018 | 1.561992  | -0.099606 |
| 8 | 2.887164  | -1.036857 | 1.732713  |
| 1 | 2.939375  | -1.382675 | 0.802734  |
| 1 | 3.565337  | -1.491758 | 2.241367  |
| 8 | 2.803154  | -1.714061 | -0.873768 |
| 1 | 1.887899  | -1.977228 | -1.071515 |
| 1 | 2.933630  | -0.870213 | -1.342890 |
| 8 | 2.884998  | 1.035861  | -1.734290 |
| 1 | 2.937552  | 1.381800  | -0.804378 |
| 1 | 3.564161  | 1.489593  | -2.242690 |
| 8 | 2.804696  | 1.713645  | 0.872502  |
| 1 | 1.891011  | 1.979230  | 1.073855  |
| 1 | 2.935308  | 0.870192  | 1.342224  |

\$nbo file=w12\_q4\_t8 archive nrt plot memory=10gb nrtres=50000 \$end

\*\*\*\*\*

```
%mem=2gb
%nprocshared=8
%chk=w16_q8_t8
#b3lyp/6-311++G** pop=nbo7read
```

w16\_q8\_t8 ("3-cube"), E(RB3LYP) = -1223.60719747

nu: 44,45(2),64,...

|                           |        |        |        |        |        |
|---------------------------|--------|--------|--------|--------|--------|
| Vibrational temperatures: | 63.87  | 64.59  | 65.27  | 92.21  | 100.60 |
| (Kelvin)                  | 114.32 | 116.40 | 116.98 | 123.36 | 129.54 |
|                           | 130.40 | 143.12 | 151.59 | 159.80 | 159.86 |
|                           | 162.63 | 179.98 | 205.99 | 230.17 | 232.50 |
|                           | 241.82 | 248.72 | 256.11 | 263.91 | 277.97 |
|                           | 281.88 | 286.77 | 288.09 | 293.97 | 305.07 |
|                           | 310.63 | 351.71 | 354.68 | 356.51 | 374.32 |

|                                              |         |         |              |                    |
|----------------------------------------------|---------|---------|--------------|--------------------|
| 377.91                                       | 379.31  | 380.43  | 385.07       | 387.95             |
| 402.89                                       | 407.21  | 468.73  | 474.44       | 487.54             |
| 495.10                                       | 641.53  | 659.12  | 663.56       | 676.76             |
| 718.81                                       | 731.51  | 735.93  | 739.84       | 742.54             |
| 756.78                                       | 762.72  | 771.66  | 783.11       | 817.05             |
| 823.79                                       | 841.74  | 877.20  | 897.78       | 946.34             |
| 961.20                                       | 972.02  | 991.37  | 994.09       | 1000.31            |
| 1020.10                                      | 1032.79 | 1044.20 | 1045.51      | 1047.98            |
| 1062.15                                      | 1093.57 | 1193.02 | 1205.59      | 1206.44            |
| 1242.10                                      | 1257.71 | 1305.50 | 1306.85      | 1439.48            |
| 1446.61                                      | 1477.24 | 1534.98 | 1558.91      | 1576.76            |
| 2358.86                                      | 2360.10 | 2365.63 | 2367.82      | 2387.30            |
| 2388.87                                      | 2396.03 | 2412.34 | 2418.35      | 2420.09            |
| 2451.97                                      | 2453.55 | 2461.92 | 2470.49      | 2473.36            |
| 2503.03                                      | 4656.24 | 4657.02 | 4710.84      | 4714.56            |
| 4879.79                                      | 4881.88 | 4982.08 | 4982.14      | 5018.53            |
| 5035.45                                      | 5046.40 | 5076.41 | 5215.88      | 5216.45            |
| 5220.83                                      | 5221.21 | 5248.23 | 5248.64      | 5249.02            |
| 5254.59                                      | 5297.20 | 5301.35 | 5316.70      | 5317.44            |
| 5338.37                                      | 5340.61 | 5340.94 | 5347.65      | 5576.24            |
| 5576.30                                      | 5576.63 | 5576.80 |              |                    |
| Zero-point correction=                       |         |         | 0.412633     | (Hartree/Particle) |
| Thermal correction to Energy=                |         |         | 0.449176     |                    |
| Thermal correction to Enthalpy=              |         |         | 0.450120     |                    |
| Thermal correction to Gibbs Free Energy=     |         |         | 0.347911     |                    |
| Sum of electronic and zero-point Energies=   |         |         | -1223.194565 |                    |
| Sum of electronic and thermal Energies=      |         |         | -1223.158021 |                    |
| Sum of electronic and thermal Enthalpies=    |         |         | -1223.157077 |                    |
| Sum of electronic and thermal Free Energies= |         |         | -1223.259287 |                    |

0 1

|   |           |           |           |
|---|-----------|-----------|-----------|
| 8 | -4.296553 | -1.496620 | 1.356834  |
| 1 | -4.353644 | -1.556024 | 0.366439  |
| 1 | -4.971037 | -2.082308 | 1.714205  |
| 8 | -4.222145 | -1.384905 | -1.331755 |
| 1 | -4.352233 | -0.441586 | -1.537476 |
| 1 | -3.308467 | -1.581324 | -1.601637 |
| 8 | -4.297111 | 1.496303  | -1.356558 |
| 1 | -4.354373 | 1.555716  | -0.366168 |
| 1 | -4.971867 | 2.081593  | -1.714067 |
| 8 | -4.222868 | 1.384645  | 1.331974  |
| 1 | -4.352523 | 0.441272  | 1.537716  |
| 1 | -3.309236 | 1.581442  | 1.601744  |
| 8 | -1.367410 | 1.437911  | 1.350343  |
| 1 | -1.352839 | 1.527342  | 0.371776  |
| 1 | -0.480711 | 1.706230  | 1.646193  |
| 8 | -1.466110 | -1.351715 | 1.438337  |
| 1 | -1.455839 | -0.373819 | 1.532210  |
| 1 | -2.383022 | -1.613979 | 1.638857  |
| 8 | -1.366503 | -1.437532 | -1.350674 |
| 1 | -1.352211 | -1.526879 | -0.372106 |
| 1 | -0.479717 | -1.705963 | -1.646209 |
| 8 | -1.466569 | 1.352195  | -1.438803 |
| 1 | -2.383729 | 1.613692  | -1.639185 |
| 1 | -1.455525 | 0.374319  | -1.532662 |
| 8 | 1.465818  | 1.352323  | 1.436612  |
| 1 | 1.455085  | 0.374547  | 1.531818  |
| 1 | 2.383163  | 1.614133  | 1.636021  |
| 8 | 1.367087  | -1.437507 | 1.352170  |
| 1 | 0.479275  | -1.702771 | 1.647510  |
| 1 | 1.352674  | -1.527852 | 0.373736  |
| 8 | 1.466316  | -1.353865 | -1.436994 |
| 1 | 1.455089  | -0.376076 | -1.531728 |
| 1 | 2.383760  | -1.615054 | -1.636689 |
| 8 | 1.367036  | 1.436347  | -1.351579 |
| 1 | 0.480616  | 1.703608  | -1.649098 |

```

1      1.350446    1.525641   -0.373004
8      4.296134    1.499195    1.355131
1      4.353719    1.557065    0.364654
1      4.967639    2.088639    1.711905
8      4.222607    1.383683   -1.333357
1      3.308292    1.578646   -1.602204
1      4.353632    0.440402   -1.538414
8      4.296641   -1.498239   -1.355295
1      4.354503   -1.556090   -0.364908
1      4.969082   -2.086526   -1.712251
8      4.224267   -1.382293    1.333712
1      3.310640   -1.578630    1.603617
1      4.354261   -0.438816    1.538622

$nb0 file=w16_q8_t8 archive nrt plot memory=10gb nrtres=50000 $end

*****
%mem=2gb
%nprocshared=8
%chk=w7_q1_d6
#b3lyp/6-311++G** pop=nb07read

w7_2_pane (w7_q1_d6), E(RB3LYP) =  -535.304096032
nu: 20,21,35,...
Vibrational temperatures:    28.89    30.70    50.56    79.55    84.01
(Kelvin)                    96.63   132.97   228.58   245.02   300.16
                             311.94   319.09   322.82   341.51   351.71
                             366.24   372.45   386.20   399.74   411.90
                             437.52   588.58   610.41   639.04   648.12
                             704.38   808.98   954.33  1015.07  1059.35
                             1115.19  1170.67  1216.83  1255.71  1417.00
                             1444.86  2355.29  2363.88  2376.25  2388.92
                             2408.61  2419.36  2432.94  4849.98  4877.72
                             4960.04  4982.73  5021.29  5025.23  5063.16
                             5087.47  5587.36  5587.93  5592.73  5593.48
                             5595.90  5605.01

Zero-point correction=          0.174368 (Hartree/Particle)
Thermal correction to Energy=    0.192388
Thermal correction to Enthalpy=  0.193332
Thermal correction to Gibbs Free Energy= 0.127129
Sum of electronic and zero-point Energies= -535.129728
Sum of electronic and thermal Energies= -535.111708
Sum of electronic and thermal Enthalpies= -535.110764
Sum of electronic and thermal Free Energies= -535.176967

0 1
8      1.911789   -1.248910   -1.448148
1      2.730968   -0.874115   -1.053877
1      2.063596   -2.192978   -1.547023
8      3.930843    0.002077   -0.079789
1      3.371962    0.485958    0.568633
1      4.503985    0.660651   -0.482686
8      2.046666    1.210961    1.496046
1      1.224217    0.826568    1.116936
1      1.962962    1.151094    2.451621
8      0.006390   -0.030527    0.118645
1      0.578420   -0.570841   -0.471110
1      -0.631277   -0.642439    0.546151
8      -2.074540   -1.538603    1.101115
1      -2.857052   -1.048888    0.763997
1      -2.301052   -1.860377    1.977454
8      -3.936683    0.078122   -0.108849
1      -3.298534    0.670240   -0.567566
1      -4.592173    0.652842    0.296011
8      -1.878703    1.534815   -1.168342
1      -1.110445    1.062163   -0.776027

```

```

1          -1.691678    1.616641    -2.107949

$nb0 file=w7_q1_d6 archive nrt plot $end

*****
%mem=2gb
%nprocshared=8
%chk=w8_q1_t2_d5
#b3lyp/6-311++G** pop=nbo7read

w8_3_pane (w8_q1_t2_d5) (from w2@w6c start), -611.778975556
nu: 23,34,38,...
Vibrational temperatures:      33.41    49.59    54.46    62.84    89.63
(Kelvin)                      98.15   122.43   136.63   207.89   245.66
                                266.05   282.36   301.27   309.23   317.89
                                328.69   333.90   349.26   376.18   382.50
                                403.70   410.08   446.01   467.49   541.36
                                591.88   624.79   646.07   671.69   816.46
                                832.40   930.74   987.51  1041.06  1090.43
                                1110.15  1167.78  1177.64  1220.82  1249.38
                                1406.41  1574.06  2349.62  2357.04  2364.19
                                2373.97  2402.05  2407.74  2428.16  2507.23
                                4523.50  4768.16  4885.30  4947.49  5015.66
                                5087.37  5142.69  5182.50  5262.52  5275.94
                                5577.48  5584.87  5592.64  5593.70  5594.54
                                5596.56

Zero-point correction=          0.200422 (Hartree/Parti$
Thermal correction to Energy=    0.220678
Thermal correction to Enthalpy=  0.221622
Thermal correction to Gibbs Free Energy= 0.151112
Sum of electronic and zero-point Energies= -611.578553
Sum of electronic and thermal Energies= -611.558298
Sum of electronic and thermal Enthalpies= -611.557354
Sum of electronic and thermal Free Energies= -611.627863

0 1
8          1.736329    0.965622    1.369414
1          2.550428    0.577434    0.963085
1          1.933799    1.122497    2.297875
8          3.713564   -0.265693    0.005766
1          3.212105   -0.959323   -0.485992
1          4.517371   -0.683729    0.326705
8          2.033750   -2.065766   -1.126656
1          1.180829   -1.760564   -0.738011
1          1.880574   -2.160982   -2.071267
8          -0.106594   -0.913149    0.154090
1          0.410610   -0.352203    0.759382
1          -0.558947   -0.257487   -0.449895
8          -1.366770    0.943616   -1.286463
1          -2.294772    0.909985   -0.981687
1          -0.975716    1.775703   -0.963161
8          -3.853848    0.291825   -0.180135
1          -3.537569   -0.495155    0.310554
1          -4.595800   -0.007543   -0.713023
8          -2.573126   -1.846744    1.044839
1          -1.637116   -1.638483    0.835273
1          -2.597876   -2.090790    1.974098
8          0.268210    2.912680   -0.093139
1          0.861026    2.331396    0.419032
1          0.838946    3.510110   -0.584689

```

```

$nb0 file=w8_q1_t2_d5 archive nrt $end

*****
%mem=2gb
%nprocshared=8

```

```

%chk=w10_q1_t4_d5
#b3lyp/6-311++G** pop=nbo7read

w10_4_pane (w10_q1_t4_d5), E(RB3LYP) = -764.725313538
nu: 14,24,30,...
Vibrational temperatures:      20.51      34.08      43.22      47.38      52.33
      (Kelvin)
      71.03      80.41      89.20      119.00     125.94
      144.27     190.55     211.41     243.38     250.20
      263.94     284.94     292.90     303.76     307.31
      313.92     328.61     330.48     356.73     382.67
      395.25     403.20     418.99     427.08     461.40
      482.43     535.44     540.33     631.38     654.77
      673.49     735.09     759.65     819.63     841.53
      858.09     960.30     991.41    1008.08    1043.13
      1066.77    1159.51    1183.32    1199.60    1207.70
      1251.04    1282.16    1415.73    1651.53    2349.11
      2356.28    2370.50    2371.78    2381.68    2406.14
      2410.57    2425.53    2471.09    2515.93    4322.20
      4776.94    4818.58    4910.22    4966.69    4973.54
      5082.98    5149.20    5186.91    5193.87    5259.35
      5273.08    5397.59    5576.76    5579.56    5581.21
      5594.85    5596.18    5597.08    5601.77

Zero-point correction=          0.250880 (Hartree/Particle)
Thermal correction to Energy=          0.276654
Thermal correction to Enthalpy=        0.277598
Thermal correction to Gibbs Free Energy= 0.192841
Sum of electronic and zero-point Energies= -764.474433
Sum of electronic and thermal Energies=    -764.448660
Sum of electronic and thermal Enthalpies=  -764.447716
Sum of electronic and thermal Free Energies= -764.532473

0 1
      8      3.150771      0.618464      1.202148
      1      3.763650     -0.001187      0.735041
      1      3.501820      0.746178      2.088833
      8      4.497432     -1.168370     -0.308007
      1      3.753461     -1.657903     -0.732651
      1      5.157846     -1.823917     -0.067316
      8      2.215460     -2.302714     -1.246407
      1      1.557204     -1.774071     -0.738595
      1      1.953088     -2.239339     -2.169693
      8      0.696993     -0.617300      0.319313
      1      1.438373     -0.234282      0.823029
      1      0.378056      0.143499     -0.258433
      8     -0.144492      1.456287     -1.063732
      1     -0.999676      1.698569     -0.642356
      1      0.500910      2.156284     -0.859721
      8     -2.486173      1.665999      0.355398
      1     -2.338889      0.929768      0.967874
      1     -3.320661      1.438063     -0.098520
      8     -1.690436     -0.943842      1.596774
      1     -0.777854     -0.911112      1.218034
      1     -1.600958     -1.170159      2.527422
      8      2.146322      2.887482     -0.209372
      1      2.608436      2.170622      0.262610
      1      2.802701      3.303904     -0.775028
      8     -4.795468      0.524901     -0.806370
      1     -4.586168     -0.405157     -0.587871
      1     -4.992693      0.543226     -1.746850
      8     -3.853287     -1.931097      0.127359
      1     -3.058965     -1.679418      0.639979
      1     -3.636658     -2.752050     -0.322618

```

```
$nbo file=w10_q1_t4_d5 archive nrt plot $end
```

```
*****
```

```

%mem=2gb
%nprocshared=8
%chk=w12_q3_t2_d7
#b3lyp/6-311++G** pop=nbo7read

w12_5_pane (w12_q3_t2_d7), E(RB3LYP) = -917.678777032
nu: 9,19,25,...
Vibrational temperatures:      13.33      27.82      36.39      44.29      47.12
(Kelvin)                      53.85      61.36      77.69      80.69      89.58
                                109.06     114.91     128.51     134.66     175.72
                                194.72     221.67     245.29     263.00     271.08
                                279.47     295.59     304.63     309.68     324.54
                                330.87     332.66     336.85     346.06     354.28
                                367.77     376.55     399.38     401.78     408.24
                                429.46     445.23     484.11     544.95     584.86
                                603.34     640.40     667.11     704.19     769.75
                                787.25     817.59     838.45     890.41     934.04
                                955.54    1005.11    1028.31    1056.13    1108.64
                                1121.03    1140.10    1159.56    1185.41    1197.25
                                1212.95    1239.63    1283.00    1416.14    1456.15
                                1583.68    2352.91    2358.33    2371.33    2377.11
                                2384.96    2396.03    2400.90    2405.29    2423.22
                                2437.09    2482.06    2504.38    4622.48    4789.29
                                4876.37    4899.69    4953.38    4970.10    4990.08
                                5014.19    5060.29    5081.22    5117.83    5133.96
                                5156.47    5193.88    5235.73    5266.32    5574.08
                                5586.10    5590.50    5592.52    5593.48    5597.15
                                5600.62    5612.38

Zero-point correction=                0.302194 (Hartree/Particle)
Thermal correction to Energy=          0.333166
Thermal correction to Enthalpy=         0.334110
Thermal correction to Gibbs Free Energy= 0.236318
Sum of electronic and zero-point Energies= -917.376583
Sum of electronic and thermal Energies=    -917.345611
Sum of electronic and thermal Enthalpies=   -917.344667
Sum of electronic and thermal Free Energies= -917.442459

0 1
      8      -3.075179    -1.265748    0.622555
      1      -3.893211    -0.720308    0.721684
      1      -3.027105    -1.853565    1.383043
      8      -5.083186     0.541513    0.661123
      1      -4.587503     1.362208    0.428911
      1      -5.691692     0.779223    1.366206
      8      -3.402097     2.589294    0.055451
      1      -2.542763     2.106599    0.035095
      1      -3.443189     3.101830   -0.757120
      8      -1.246828     0.889642    0.117494
      1      -1.756721     0.118236    0.429248
      1      -0.916778     0.605188   -0.778069
      8      -0.327931    -0.136649   -2.194657
      1       0.581179    -0.434800   -2.003870
      1      -0.881176    -0.934906   -2.283062
      8       2.227839    -0.612006   -1.039798
      1       1.930608    -0.070145   -0.277342
      1       3.004230    -0.123895   -1.386744
      8       1.319663     0.824380     1.206153
      1       0.372891     0.942730     0.978663
      1       1.374279     0.115289     1.883087
      8      -2.242518    -2.188265   -1.930427
      1      -2.632843    -1.956550   -1.066964
      1      -2.980109    -2.374485   -2.518097
      8       4.337803     1.125249   -1.581749
      1       4.151857     1.720608   -0.826029
      1       4.354196     1.684742   -2.363447
      8       3.455755     2.462992     0.675817

```

```

1          2.645954    1.989104    0.963306
1          3.388209    3.362802    1.004387
8          1.598628   -1.441297    2.750294
1          1.967661   -2.048903    2.071563
1          2.169231   -1.516380    3.520204
8          2.514284   -2.833589    0.558785
1          2.500504   -2.137787   -0.136919
1          3.302423   -3.360946    0.403933

$nb0 file=w12_q3_t2_d7 archive nrt $end

*****
%mem=2gb
%nprocshared=8
%chk=w14_q3_t8_d3
#b3lyp/6-311++G** pop=nb07read

w14_6p (w14_q3_t8_d3), E(RB3LYP) = -1070.63164768
nu: 9,15,27,...
Vibrational temperatures:    13.61    21.20    39.21    48.96    54.32
(Kelvin)                    71.89    77.74    88.89   102.06   114.28
                             116.13   124.70   130.26   136.00   160.42
                             180.54   197.07   205.01   230.08   239.29
                             244.87   256.65   267.41   277.17   289.13
                             297.48   303.41   305.23   322.23   342.32
                             349.50   361.15   368.96   390.06   393.04
                             400.81   411.05   424.09   438.55   448.69
                             457.43   501.57   510.46   611.78   628.01
                             634.42   657.96   683.12   697.04   714.87
                             728.88   765.24   784.24   825.09   830.82
                             859.56   874.04   880.10   913.47   946.16
                             956.93   984.84  1001.97  1032.13  1054.82
                             1067.23  1095.21  1136.82  1145.88  1165.68
                             1171.78  1201.93  1231.67  1302.38  1398.32
                             1438.98  1507.38  1657.74  2347.83  2361.36
                             2364.22  2375.92  2376.24  2393.38  2398.53
                             2412.91  2427.33  2440.94  2454.39  2474.55
                             2483.01  2511.33  4351.35  4718.55  4758.49
                             4891.84  4938.42  4965.03  4995.16  5010.39
                             5027.14  5096.99  5150.94  5157.19  5173.51
                             5254.94  5262.76  5272.78  5291.82  5337.03
                             5342.83  5382.68  5388.58  5559.61  5573.77
                             5574.16  5578.46  5584.00  5592.74  5595.44
Zero-point correction=          0.356184 (Hartree/Particle)
Thermal correction to Energy=    0.390613
Thermal correction to Enthalpy=   0.391557
Thermal correction to Gibbs Free Energy= 0.288126
Sum of electronic and zero-point Energies= -1070.275464
Sum of electronic and thermal Energies= -1070.241034
Sum of electronic and thermal Enthalpies= -1070.240090
Sum of electronic and thermal Free Energies= -1070.343522

0 1
8          -4.376155   -1.658535   -0.769855
1          -3.908854   -1.988313    0.016363
1          -4.772469   -0.818721   -0.478702
8          -2.626073   -1.992290    1.507595
1          -2.733221   -1.115370    1.934573
1          -2.589576   -2.647464    2.211787
8          -2.897795    0.704252    2.160522
1          -2.142377    1.045399    1.590457
1          -2.802761    1.117862    3.024925
8          -2.421644   -0.978518   -2.491401
1          -3.201434   -1.316868   -1.981977
1          -2.452758   -1.381261   -3.364856
8          -0.558634   -1.244679   -0.373328

```

|   |           |           |           |
|---|-----------|-----------|-----------|
| 1 | -1.140083 | -1.709925 | 0.252799  |
| 1 | -1.029767 | -1.262273 | -1.228858 |
| 8 | -1.026777 | 1.397476  | 0.444488  |
| 1 | -0.727394 | 0.509482  | 0.151061  |
| 1 | -1.549191 | 1.727402  | -0.323526 |
| 8 | 2.172432  | -0.681883 | 0.252529  |
| 1 | 1.336053  | -1.087365 | -0.029021 |
| 1 | 2.751757  | -1.388824 | 0.614292  |
| 8 | 1.731065  | 1.903244  | 1.317517  |
| 1 | 0.806941  | 2.020251  | 1.048136  |
| 1 | 1.926864  | 0.974696  | 1.082571  |
| 8 | 4.216823  | 0.584195  | -1.324876 |
| 1 | 3.404662  | 0.190920  | -0.958411 |
| 1 | 4.224347  | 1.496830  | -0.974515 |
| 8 | 3.834372  | 3.066656  | -0.043313 |
| 1 | 3.052297  | 2.797949  | 0.488515  |
| 1 | 3.586540  | 3.879865  | -0.491409 |
| 8 | 4.088264  | -2.477994 | 1.074668  |
| 1 | 4.835348  | -2.154361 | 0.517118  |
| 1 | 4.414666  | -2.460667 | 1.978999  |
| 8 | 5.962185  | -1.289627 | -0.499175 |
| 1 | 5.430426  | -0.526574 | -0.842722 |
| 1 | 6.387409  | -1.686427 | -1.264300 |
| 8 | -2.781334 | 1.783497  | -1.640935 |
| 1 | -3.631914 | 1.656787  | -1.191922 |
| 1 | -2.643701 | 0.965813  | -2.149708 |
| 8 | -4.910548 | 0.978639  | 0.242086  |
| 1 | -4.347198 | 0.985375  | 1.044077  |
| 1 | -5.734053 | 1.420323  | 0.472078  |

\$nbo file=w14\_q3\_t8\_d3 archive \$end

\*\*\*\*\*

%mem=2gb

%nprocshared=8

%chk=w14\_q4\_t4\_d6

#b3lyp/6-311++G\*\* pop=nbo7read

w14\_6\_pane (w14\_q4\_t4\_d6), E(RB3LYP) = -1070.63220856

nu: 16,18,29,...

|                           |         |         |         |         |         |
|---------------------------|---------|---------|---------|---------|---------|
| Vibrational temperatures: | 22.96   | 26.34   | 41.39   | 48.62   | 53.58   |
| (Kelvin)                  | 59.27   | 60.92   | 71.49   | 78.82   | 90.96   |
|                           | 100.06  | 106.47  | 111.36  | 128.62  | 134.54  |
|                           | 136.03  | 182.71  | 195.81  | 214.87  | 222.45  |
|                           | 229.05  | 240.59  | 260.36  | 269.78  | 278.77  |
|                           | 286.84  | 293.30  | 304.78  | 306.67  | 313.05  |
|                           | 318.32  | 322.74  | 332.94  | 341.77  | 349.92  |
|                           | 361.82  | 377.00  | 384.32  | 402.31  | 412.36  |
|                           | 427.03  | 434.73  | 444.43  | 471.27  | 592.30  |
|                           | 594.85  | 596.00  | 620.87  | 701.59  | 730.00  |
|                           | 735.60  | 760.40  | 777.03  | 792.25  | 829.41  |
|                           | 888.82  | 904.22  | 911.60  | 915.08  | 929.61  |
|                           | 998.10  | 1008.28 | 1029.39 | 1037.99 | 1102.64 |
|                           | 1112.15 | 1118.27 | 1151.44 | 1163.07 | 1187.16 |
|                           | 1209.45 | 1251.20 | 1265.96 | 1299.00 | 1416.44 |
|                           | 1438.84 | 1501.23 | 1546.31 | 2353.09 | 2361.88 |
|                           | 2363.96 | 2372.78 | 2384.44 | 2391.76 | 2392.96 |
|                           | 2397.40 | 2403.41 | 2422.34 | 2423.74 | 2463.48 |
|                           | 2480.69 | 2488.27 | 4701.40 | 4772.62 | 4823.88 |
|                           | 4870.39 | 4887.48 | 4938.16 | 4941.86 | 5002.40 |
|                           | 5036.61 | 5049.08 | 5083.45 | 5094.75 | 5111.34 |
|                           | 5144.86 | 5170.32 | 5184.26 | 5212.33 | 5233.05 |
|                           | 5309.68 | 5320.92 | 5579.74 | 5580.19 | 5595.00 |
|                           | 5598.54 | 5598.72 | 5601.48 | 5602.82 | 5609.01 |

Zero-point correction= 0.354244 (Hartree/Particle)

Thermal correction to Energy= 0.389778

```

Thermal correction to Enthalpy=          0.390723
Thermal correction to Gibbs Free Energy=  0.284144
Sum of electronic and zero-point Energies= -1070.277965
Sum of electronic and thermal Energies=    -1070.242430
Sum of electronic and thermal Enthalpies=   -1070.241486
Sum of electronic and thermal Free Energies= -1070.348064

```

```

0 1
      8      2.416491 -2.434217 -0.151069
      1      3.206778 -2.186202 -0.691190
      1      2.420495 -3.392673 -0.068481
      8      4.378606 -1.345355 -1.647472
      1      3.936484 -0.495442 -1.891180
      1      4.838825 -1.652068 -2.433233
      8      2.833601  0.819231 -2.182533
      1      1.962804  0.387494 -2.099444
      1      2.829748  1.503418 -1.491561
      8      0.508695 -0.638253 -1.288117
      1      1.021892 -1.412561 -0.987963
      1      0.470562 -0.058475 -0.494114
      8      0.445683  0.953246  0.988991
      1     -0.499272  0.981372  1.246232
      1      0.941650  0.338295  1.588498
      8     -2.323306  0.729192  1.113925
      1     -2.309012  0.248590  0.255877
      1     -2.905221  1.499632  0.942713
      8     -2.265581 -0.731207 -1.275004
      1     -1.305909 -0.844558 -1.444829
      1     -2.623915 -1.593636 -0.969085
      8      2.182360 -0.703464  2.185652
      1      2.355459 -1.379122  1.507664
      1      2.983040 -0.146766  2.221780
      8     -4.072143  2.641571  0.115232
      1     -4.128095  2.264648 -0.788490
      1     -3.951434  3.588871  0.007700
      8     -3.964733  1.195249 -2.232939
      1     -3.341700  0.461042 -2.040549
      1     -3.904063  1.374937 -3.174504
      8     -3.314153 -2.924122 -0.001718
      1     -3.421884 -2.551329  0.900018
      1     -4.148153 -3.347432 -0.223336
      8     -3.367699 -1.511898  2.368287
      1     -3.041454 -0.629712  2.086579
      1     -4.036409 -1.358121  3.040846
      8      4.182255  1.264794  1.939789
      1      3.717512  1.870312  1.332755
      1      4.586026  1.812135  2.618798
      8      2.424749  2.569482  0.135429
      1      1.599227  2.137863  0.467308
      1      2.227442  3.505503  0.033559

```

```
$nbo file=w14_q4_t4_d6 archive nrt plot $end
```

```
*****
```

```

%mem=4GB
%nprocshared=8
%chk=w16_q8_d8
#N B3LYP/6-311++G** POP=NB06Read

```

```

w16_7_pane (w16_q8_d8), E(RB3LYP) = -1223.5921758
nu: 20,25,29,...

```

```

Vibrational temperatures:  28.19   35.44   42.25   44.58   47.35
                           (Kelvin) 50.72   55.81   60.90   61.91   92.05
                           97.10  102.51  111.57  114.14  118.62
                           135.05  148.16  154.97  164.71  186.55
                           198.38  209.43  217.59  247.40  253.21

```

|                                              |         |              |                    |         |
|----------------------------------------------|---------|--------------|--------------------|---------|
| 270.42                                       | 271.56  | 280.63       | 282.58             | 288.97  |
| 290.76                                       | 303.93  | 307.12       | 311.47             | 313.66  |
| 338.77                                       | 340.87  | 345.09       | 356.63             | 361.21  |
| 372.78                                       | 375.25  | 378.27       | 383.11             | 392.72  |
| 401.57                                       | 418.66  | 435.74       | 445.53             | 458.01  |
| 593.48                                       | 615.70  | 619.83       | 622.04             | 635.03  |
| 637.36                                       | 652.05  | 768.09       | 776.27             | 800.14  |
| 826.39                                       | 845.03  | 883.26       | 892.22             | 898.21  |
| 930.15                                       | 952.36  | 991.87       | 1002.00            | 1031.51 |
| 1038.29                                      | 1062.07 | 1080.48      | 1092.31            | 1102.61 |
| 1112.14                                      | 1135.85 | 1147.48      | 1168.05            | 1209.38 |
| 1221.96                                      | 1230.76 | 1240.96      | 1252.51            | 1291.87 |
| 1352.67                                      | 1379.42 | 1466.12      | 1487.82            | 1501.52 |
| 2353.75                                      | 2358.74 | 2359.43      | 2363.81            | 2381.82 |
| 2384.42                                      | 2386.39 | 2393.79      | 2400.12            | 2403.48 |
| 2425.88                                      | 2463.31 | 2472.89      | 2473.30            | 2487.12 |
| 2500.89                                      | 4846.66 | 4882.88      | 4926.88            | 4970.69 |
| 4977.96                                      | 4983.97 | 4985.47      | 5005.45            | 5018.38 |
| 5028.30                                      | 5034.54 | 5062.80      | 5079.44            | 5081.96 |
| 5098.55                                      | 5103.56 | 5111.67      | 5127.09            | 5150.87 |
| 5153.52                                      | 5171.01 | 5185.24      | 5190.45            | 5208.68 |
| 5588.57                                      | 5591.07 | 5591.38      | 5596.84            | 5597.67 |
| 5598.74                                      | 5601.38 | 5606.55      |                    |         |
| Zero-point correction=                       |         | 0.406965     | (Hartree/Particle) |         |
| Thermal correction to Energy=                |         | 0.446898     |                    |         |
| Thermal correction to Enthalpy=              |         | 0.447842     |                    |         |
| Thermal correction to Gibbs Free Energy=     |         | 0.332048     |                    |         |
| Sum of electronic and zero-point Energies=   |         | -1223.185211 |                    |         |
| Sum of electronic and thermal Energies=      |         | -1223.145278 |                    |         |
| Sum of electronic and thermal Enthalpies=    |         | -1223.144334 |                    |         |
| Sum of electronic and thermal Free Energies= |         | -1223.260128 |                    |         |

0 1

|   |           |           |           |
|---|-----------|-----------|-----------|
| 8 | -1.380573 | -1.959443 | -0.092851 |
| 1 | -1.927699 | -2.681500 | 0.284925  |
| 1 | -0.445719 | -2.247670 | -0.114047 |
| 8 | -3.066345 | -3.557316 | 1.369066  |
| 1 | -3.227002 | -2.946263 | 2.121017  |
| 1 | -2.932670 | -4.429768 | 1.749451  |
| 8 | -3.270915 | -1.597528 | 3.305975  |
| 1 | -2.660887 | -0.911281 | 2.960528  |
| 1 | -4.094773 | -1.146158 | 3.511204  |
| 8 | -1.410777 | -0.070526 | 1.928136  |
| 1 | -1.433249 | -0.724967 | 1.191050  |
| 1 | -1.536977 | 0.790277  | 1.481694  |
| 8 | -1.347454 | 2.073678  | 0.044910  |
| 1 | -0.403359 | 2.326123  | 0.094299  |
| 1 | -1.373418 | 1.398228  | -0.670651 |
| 8 | 1.456824  | 2.010462  | 0.092332  |
| 1 | 1.484168  | 1.302456  | 0.770673  |
| 1 | 2.155184  | 2.638358  | 0.374548  |
| 8 | 1.409492  | -0.119501 | 1.945933  |
| 1 | 0.456729  | -0.125480 | 2.174869  |
| 1 | 1.535141  | -0.883155 | 1.343089  |
| 8 | -1.458804 | 0.122519  | -1.926979 |
| 1 | -1.660333 | -0.710386 | -1.456000 |
| 1 | -2.244307 | 0.396597  | -2.447271 |
| 8 | 3.512182  | 3.361492  | 1.373638  |
| 1 | 3.591423  | 2.702999  | 2.096510  |
| 1 | 3.455240  | 4.220837  | 1.800839  |
| 8 | 3.380523  | 1.325929  | 3.237248  |
| 1 | 2.701912  | 0.706802  | 2.895292  |
| 1 | 4.086282  | 0.784695  | 3.601441  |
| 8 | 1.400547  | -1.938380 | -0.165651 |
| 1 | 1.414060  | -1.229347 | -0.844094 |
| 1 | 2.066866  | -2.584170 | -0.483504 |

```

      8      1.317283      0.185215      -2.015936
      1      1.497021      0.954171      -1.434819
      1      0.356532      0.212449      -2.204150
      8      -3.659046      1.342174      -2.995638
      1      -3.709232      2.145925      -2.435850
      1      -3.911228      1.602173      -3.885391
      8      -3.473184      3.385464      -1.132581
      1      -2.693293      3.098422      -0.610221
      1      -3.416182      4.341429      -1.210889
      8      3.320858      -3.368334      -1.560275
      1      3.376914      -2.716774      -2.291863
      1      4.226182      -3.540274      -1.286297
      8      3.223542      -1.289522      -3.374715
      1      2.559575      -0.665196      -3.014064
      1      3.073871      -1.330626      -4.323224

$NBO file=w16_q8_d8 archive nrt memory=10gb nrtres=30000 plot $END

*****
%mem=10gb
%nprocshared=20
%chk=w16_q4_t12
#b3lyp/6-311++G** pop=nbo7read

w16_q4_t12 ("dicubane"), E(RB3LYP) = -1223.58854441
nu: 9,20,33,...
Vibrational temperatures:      12.23      28.51      47.91      58.20      69.38
(Kelvin)                      72.59      109.32     110.58     111.22     115.93
                                120.46     123.87     131.84     136.89     141.98
                                165.78     174.93     192.54     205.37     219.40
                                222.19     235.58     238.08     241.53     251.27
                                261.48     270.63     284.34     292.49     295.86
                                300.59     312.55     319.11     320.35     347.35
                                358.58     377.53     383.36     392.84     401.53
                                410.79     435.91     437.03     452.14     457.23
                                497.09     506.01     508.04     626.33     632.24
                                655.07     679.72     687.10     702.82     722.06
                                733.57     758.61     770.43     782.09     809.05
                                825.92     842.35     862.26     874.01     876.49
                                907.18     918.83     935.62     958.01     983.36
                                996.38     1006.43    1020.02    1035.89    1055.04
                                1063.23    1084.41    1108.74    1148.17    1149.70
                                1171.59    1175.58    1215.90    1287.59    1321.22
                                1406.65    1439.35    1440.74    1645.64    1652.47
                                2346.56    2360.89    2361.67    2375.68    2378.08
                                2396.20    2401.46    2425.88    2429.06    2440.01
                                2440.84    2452.41    2473.55    2484.00    2492.71
                                2509.69    4349.06    4392.36    4753.72    4756.39
                                4907.78    4912.42    4963.07    5014.26    5032.15
                                5085.50    5105.06    5123.51    5147.33    5156.90
                                5256.05    5268.26    5273.59    5276.05    5282.65
                                5291.61    5322.19    5342.71    5344.90    5369.64
                                5388.98    5392.32    5558.24    5572.02    5573.09
                                5577.31    5579.14    5585.51

Zero-point correction=          0.409866 (Hartree/Particle)
Thermal correction to Energy=    0.447916
Thermal correction to Enthalpy=  0.448860
Thermal correction to Gibbs Free Energy= 0.339527
Sum of electronic and zero-point Energies= -1223.178679
Sum of electronic and thermal Energies= -1223.140628
Sum of electronic and thermal Enthalpies= -1223.139684
Sum of electronic and thermal Free Energies= -1223.249017

0 1
      8      5.312777      0.993429      0.891361
      1      4.747172      0.646344      1.601650

```

|   |           |           |           |
|---|-----------|-----------|-----------|
| 1 | 5.546172  | 0.208897  | 0.364885  |
| 8 | 3.206968  | -0.259911 | 2.438355  |
| 1 | 3.130629  | -1.109850 | 1.954029  |
| 1 | 3.143397  | -0.463567 | 3.376995  |
| 8 | 3.030001  | -2.333862 | 0.581418  |
| 1 | 2.359743  | -1.899148 | -0.027311 |
| 1 | 2.730383  | -3.237523 | 0.726622  |
| 8 | 3.648228  | 2.441736  | -0.647746 |
| 1 | 4.357959  | 2.045360  | -0.080851 |
| 1 | 3.888663  | 3.359172  | -0.811410 |
| 8 | 1.468921  | 1.321412  | 0.749913  |
| 1 | 1.965455  | 0.939207  | 1.494330  |
| 1 | 2.104327  | 1.900753  | 0.283965  |
| 8 | 1.441585  | -0.907226 | -0.970384 |
| 1 | 1.326711  | -0.117413 | -0.398878 |
| 1 | 2.063551  | -0.592613 | -1.669049 |
| 8 | -1.376542 | 1.328838  | 0.489138  |
| 1 | -0.450846 | 1.510980  | 0.723839  |
| 1 | -1.850651 | 1.072952  | 1.305631  |
| 8 | -1.460810 | -0.988811 | -1.052161 |
| 1 | -0.535881 | -1.190416 | -1.267950 |
| 1 | -1.416279 | -0.134545 | -0.568365 |
| 8 | -3.746691 | 2.287297  | -1.000944 |
| 1 | -2.855227 | 2.230637  | -0.624301 |
| 1 | -3.777630 | 1.566553  | -1.664052 |
| 8 | -3.830162 | -0.122640 | -2.476220 |
| 1 | -2.981321 | -0.531388 | -2.237244 |
| 1 | -4.488559 | -0.618371 | -1.961271 |
| 8 | -3.144218 | 0.292959  | 2.392111  |
| 1 | -3.983202 | 0.614016  | 1.939032  |
| 1 | -3.256511 | 0.463368  | 3.331997  |
| 8 | -5.226796 | 1.065476  | 0.985791  |
| 1 | -4.817802 | 1.622846  | 0.282502  |
| 1 | -5.542654 | 0.272545  | 0.518382  |
| 8 | 3.501760  | 0.149044  | -2.441533 |
| 1 | 4.265510  | -0.329704 | -2.082742 |
| 1 | 3.566520  | 1.042989  | -2.063885 |
| 8 | 5.327260  | -1.391841 | -0.711685 |
| 1 | 4.627548  | -1.916809 | -0.270588 |
| 1 | 6.033051  | -2.002610 | -0.946447 |
| 8 | -5.431536 | -1.446527 | -0.416450 |
| 1 | -4.667305 | -1.847853 | 0.070467  |
| 1 | -6.108568 | -2.125510 | -0.489285 |
| 8 | -3.165272 | -2.173323 | 0.868538  |
| 1 | -2.485161 | -1.945918 | 0.204469  |
| 1 | -3.082981 | -1.481771 | 1.548828  |

\$nbo file=w16\_q4\_t12 archive nrt plot memory=30gb nrtres=50000 \$end

\*\*\*\*\*
